# Supplementary material for: EUS-guided biliary drainage is equivalent to ERCP for primary treatment of malignant distal biliary obstruction: a systematic review and meta-analysis
Source: PubMed Central journal article supplement — Endosc Int Open. 2019 Oct 22;7(11):E1432–41. doi: 10.1055/a-0990-9488 (PMC6805205; doi:10.1055/a-0990-9488), 2019-10-22

Supplementary Material

Supplemental table Profile of clinical success, technical success, and adverse events of EUS-BD versus ERCP.

| Author and Year   | Technical Success Rate (%) | Clinical Success Rate (%) | Adverse Event Rate (%) | Description of Adverse Events                                                                                                                         |
|-------------------|----------------------------|---------------------------|------------------------|-------------------------------------------------------------------------------------------------------------------------------------------------------|
| Paik et al, 2018  | EUS-BD: 60/64 (93.75)      | EUS-BD: 54/60 (90.00)     | EUS-BD: 7/64 (10.94)   | EUS-BD: Early: Self-limited pneumoperitoneum (2), Bile peritonitis (1), Cholangitis (1); Late: Cholangitis (3)                                        |
|                   | ERCP: 55/61 (90.16)        | ERCP: 52/55 (94.55)       | ERCP: 24/61 (39.34)    | ERCP: Early: Pancreatitis (9), Acute cholecystitis (2), Stent migration (1); Late: Acute cholangitis (6), Acute Cholecystitis (3) Stent occlusion (3) |
| Bang et al, 2018  | EUS-BD: 30/33 (90.91)      | EUS-BD: 32/33 (96.97)     | EUS-BD: 7/33 (21.21)   | EUS-BD: Abdominal pain (5), Acute cholecystitis, moderate (1), Bile peritonitis (1)                                                                   |
|                   | ERCP: 32/34 (94.12)        | ERCP: 31/34 (91.18)       | ERCP: 5/34 (14.71)     | ERCP: Abdominal pain, mild (3), Pancreatitis (1), Cholangitis (1)                                                                                     |
| Park et al, 2018  | EUS-BD: 13/14 (92.86)      | EUS-BD: 13/13 (100.00)    | EUS-BD: 2/14 (14.29)   | EUS-BD: Stent food impaction (2)                                                                                                                      |
|                   | ERCP: 14/14 (100.00)       | ERCP: 13/14 (92.86)       | ERCP: 4/13 (30.77)     | ERCP: Stent occlusion (4)                                                                                                                             |
| Nakai et al, 2018 | EUS-BD: 33/34 (97.06)      | EUS-BD: 33/33 (100.00)    | EUS-BD: 5/34 (14.71)   | EUS-BD: Abdominal pain, mild (2), Cholecystitis (3)                                                                                                   |
|                   | ERCP: 25/25 (100.00)       | ERCP: 25/25 (100.00)      | ERCP: 6/25 (24.00)     | ERCP: Pancreatitis (1), Cholecystitis (4), Liver abscess (1)                                                                                          |
| Yamao et al, 2018 | EUS-BD: 14/14 (100.00)     | EUS-BD: 13/14 (100.00)    | EUS-BD: 8/14 (57.14)   | EUS-BD: Cholangitis (4), Stent migration (1), Peritonitis (2), Cholecystitis (1)                                                                      |
|                   | ERCP: 14/25 (56.00)        | ERCP: 13/25 (52.00)       | ERCP: 8/25 (32.00)     | ERCP: Pancreatitis (2), Pneumoperitoneum/perforation (1), Cholangitis (5)                                                                             |

Supplemental Fig. 1a technical success rate for EUS-BD for treatment of distal malignant biliary obstruction: only randomized controlled trials, excluding low-quality studies. b Clinical success rate for EUS-BD for treatment of distal malignant biliary obstruction: only randomized controlled trials, excluding low-quality studies. c Adverse event rate for EUS-BD for treatment of distal malignant biliary obstruction: only randomized controlled trials, excluding low-quality studies. d Reintervention rate for EUS-BD for treatment of distal malignant biliary obstruction: only randomized controlled trials, excluding low-quality studies.

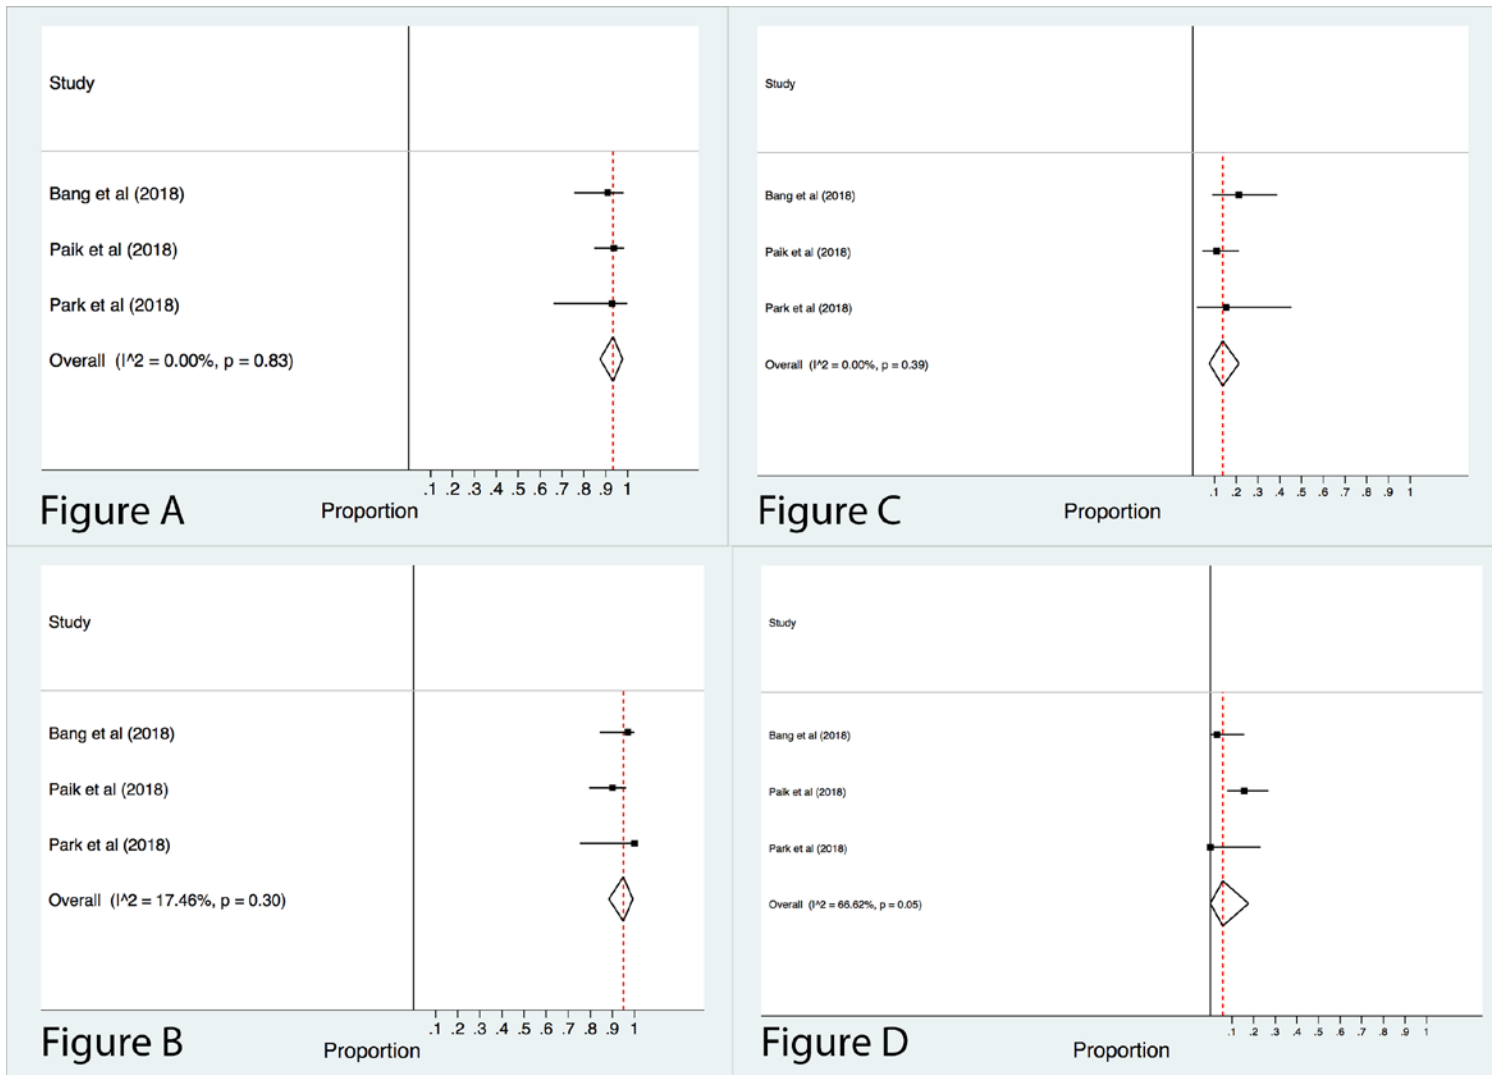

**Supplemental Fig. 2 a** Technical success rate for EUS-BD for treatment of distal malignant biliary obstruction: observational studies only. **b** Clinical success rate for EUS-BD for treatment of distal malignant biliary obstruction: observational studies only. **c** Adverse event rate for EUS-BD for treatment of distal malignant biliary obstruction: observational studies only. **d** Reintervention rate for EUS-BD for treatment of distal malignant biliary obstruction: observational studies only.

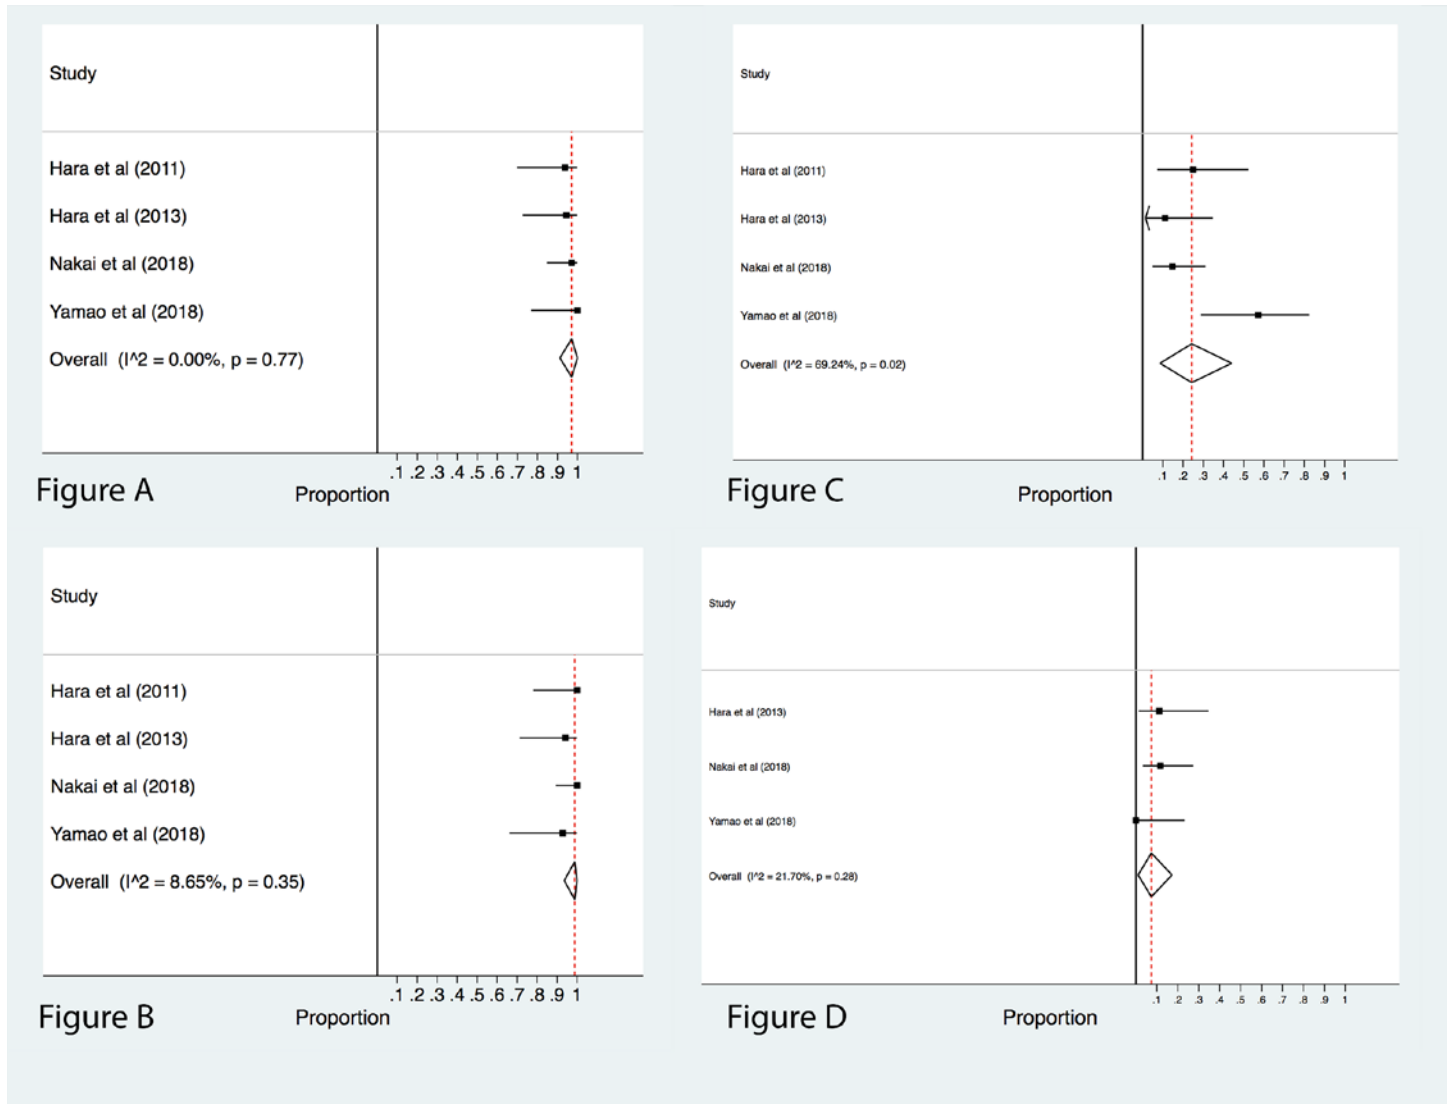

**Supplemental Fig. 3** Comparative rate of post-procedure pancreatitis of EUS-BD versus ERCP for treatment of distal malignant biliary obstruction.

| Study or Subgroup                                                                       | EUS-BD |            | ERCP   |            | Weight        | Odds Ratio<br>M-H, Random, 95% CI | Odds Ratio<br>M-H, Random, 95% CI |
|-----------------------------------------------------------------------------------------|--------|------------|--------|------------|---------------|-----------------------------------|-----------------------------------|
|                                                                                         | Events | Total      | Events | Total      |               |                                   |                                   |
| Bang et al 2018                                                                         | 0      | 33         | 1      | 34         | 23.0%         | 0.33 [0.01, 8.48]                 |                                   |
| Nakai et al 2018                                                                        | 0      | 34         | 1      | 25         | 22.9%         | 0.24 [0.01, 6.06]                 |                                   |
| Paik et al 2018                                                                         | 0      | 64         | 9      | 61         | 29.2%         | 0.04 [0.00, 0.75]                 |                                   |
| Park et al 2018                                                                         | 0      | 14         | 0      | 14         |               | Not estimable                     |                                   |
| Yamao et al 2018                                                                        | 0      | 14         | 2      | 25         | 24.9%         | 0.32 [0.01, 7.24]                 |                                   |
| <b>Total (95% CI)</b>                                                                   |        | <b>159</b> |        | <b>159</b> | <b>100.0%</b> | <b>0.17 [0.04, 0.79]</b>          |                                   |
| Total events                                                                            | 0      |            | 13     |            |               |                                   |                                   |
| Heterogeneity: $\tau^2 = 0.00$ ; $\chi^2 = 1.37$ , $df = 3$ ( $P = 0.71$ ); $I^2 = 0\%$ |        |            |        |            |               |                                   |                                   |
| Test for overall effect: $Z = 2.25$ ( $P = 0.02$ )                                      |        |            |        |            |               |                                   |                                   |

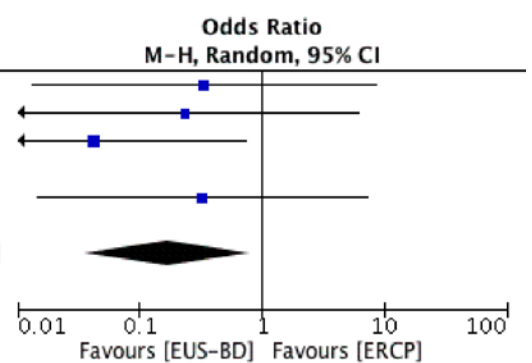

**Supplemental Fig. 4** Risk of bias summary: review authors' judgements about each risk of bias item for each included study.

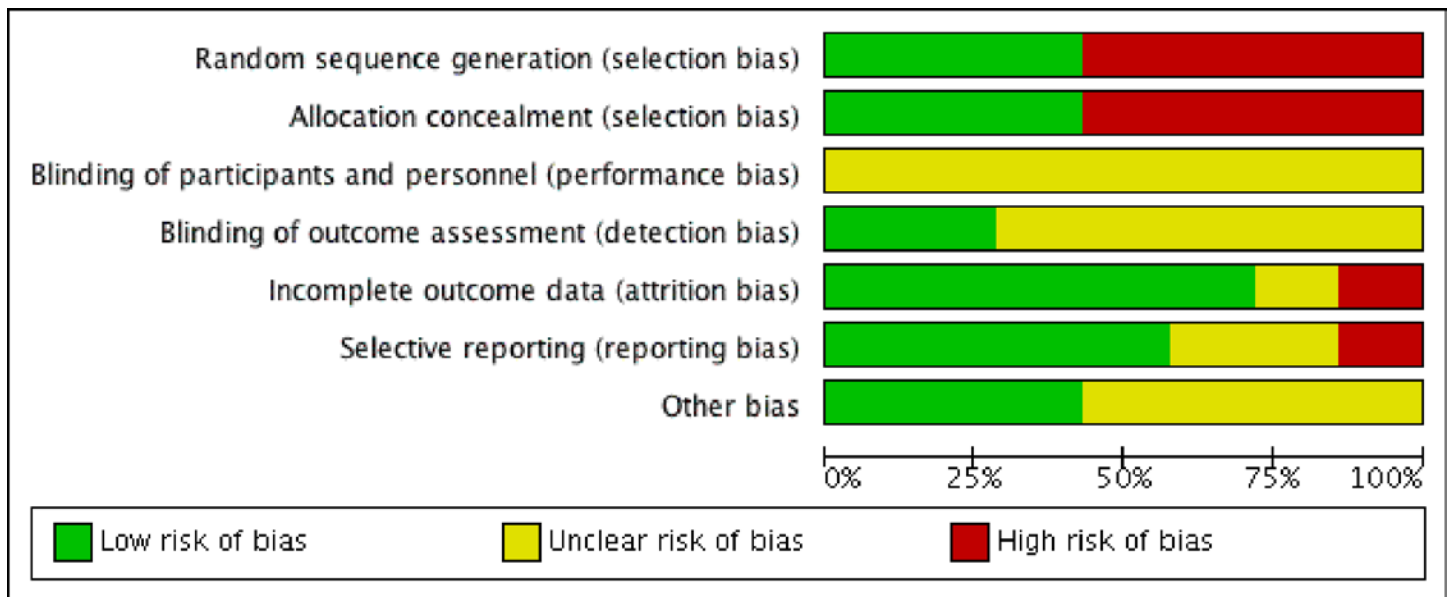

**Supplemental Fig. 5** Risk of bias graph: review authors' judgements about each risk of bias item presented as percentages across all included studies.

|                  | Random sequence generation (selection bias) | Allocation concealment (selection bias) | Blinding of participants and personnel (performance bias) | Blinding of outcome assessment (detection bias) | Incomplete outcome data (attrition bias) | Selective reporting (reporting bias) | Other bias |
|------------------|---------------------------------------------|-----------------------------------------|-----------------------------------------------------------|-------------------------------------------------|------------------------------------------|--------------------------------------|------------|
| Bang et al 2018  | +                                           | +                                       | ?                                                         | ?                                               | +                                        | +                                    | +          |
| Hara et al 2011  | -                                           | -                                       | ?                                                         | +                                               | +                                        | ?                                    | ?          |
| Hara et al 2013  | -                                           | -                                       | ?                                                         | +                                               | ?                                        | ?                                    | ?          |
| Nakai et al 2018 | -                                           | -                                       | ?                                                         | ?                                               | +                                        | -                                    | ?          |
| Paik et al 2018  | +                                           | +                                       | ?                                                         | ?                                               | +                                        | +                                    | +          |
| Park et al 2018  | +                                           | +                                       | ?                                                         | ?                                               | +                                        | +                                    | +          |
| Yamao et al 2018 | -                                           | -                                       | ?                                                         | ?                                               | -                                        | +                                    | ?          |

**Supplemental Fig. 6** Risk of publication bias funnel plot for included studies that examined technical success for EUS-BD for treatment of distal malignant biliary obstruction.

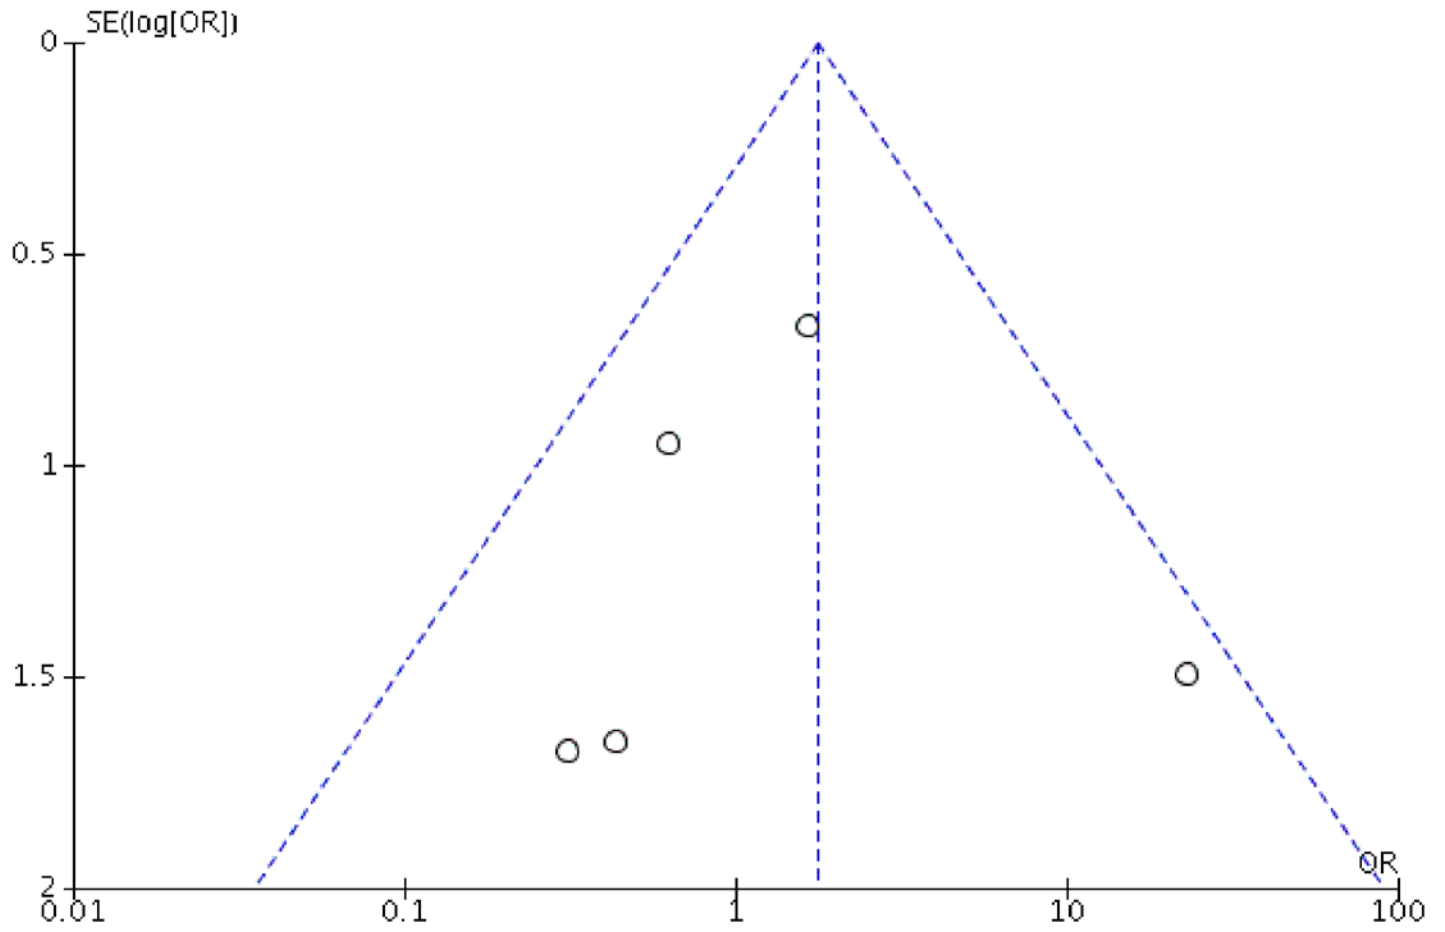

**Supplemental Fig. 7** Risk of publication bias funnel plot for included studies that examined clinical success for EUS-BD for treatment of distal malignant biliary obstruction.

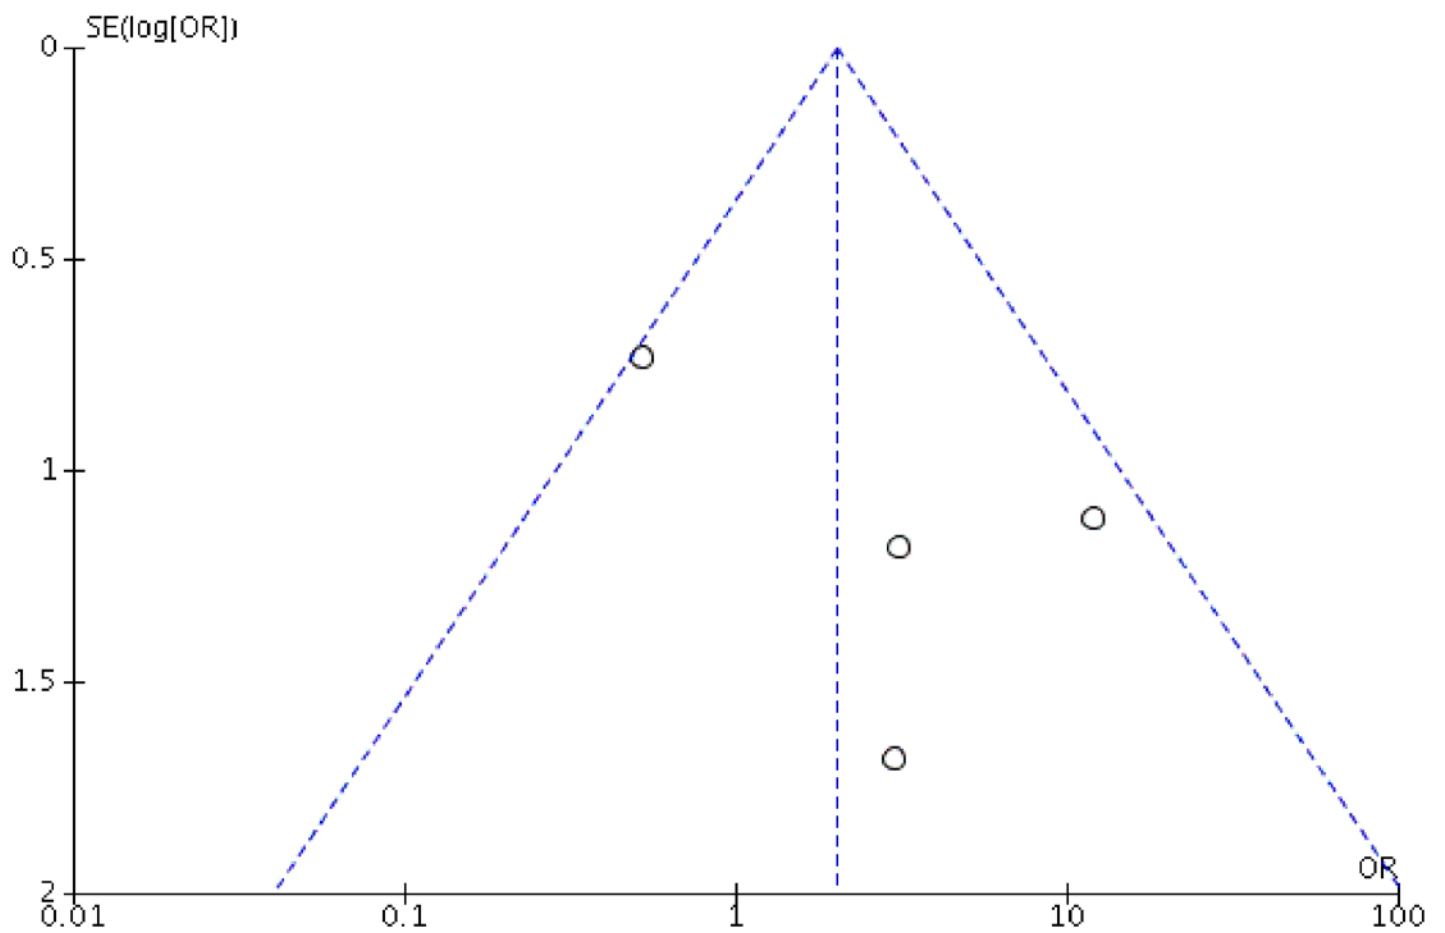

**Supplemental Fig. 8** risk of publication bias funnel plot for included studies that examined reintervention rate for EUS-BD for treatment of distal malignant biliary obstruction.

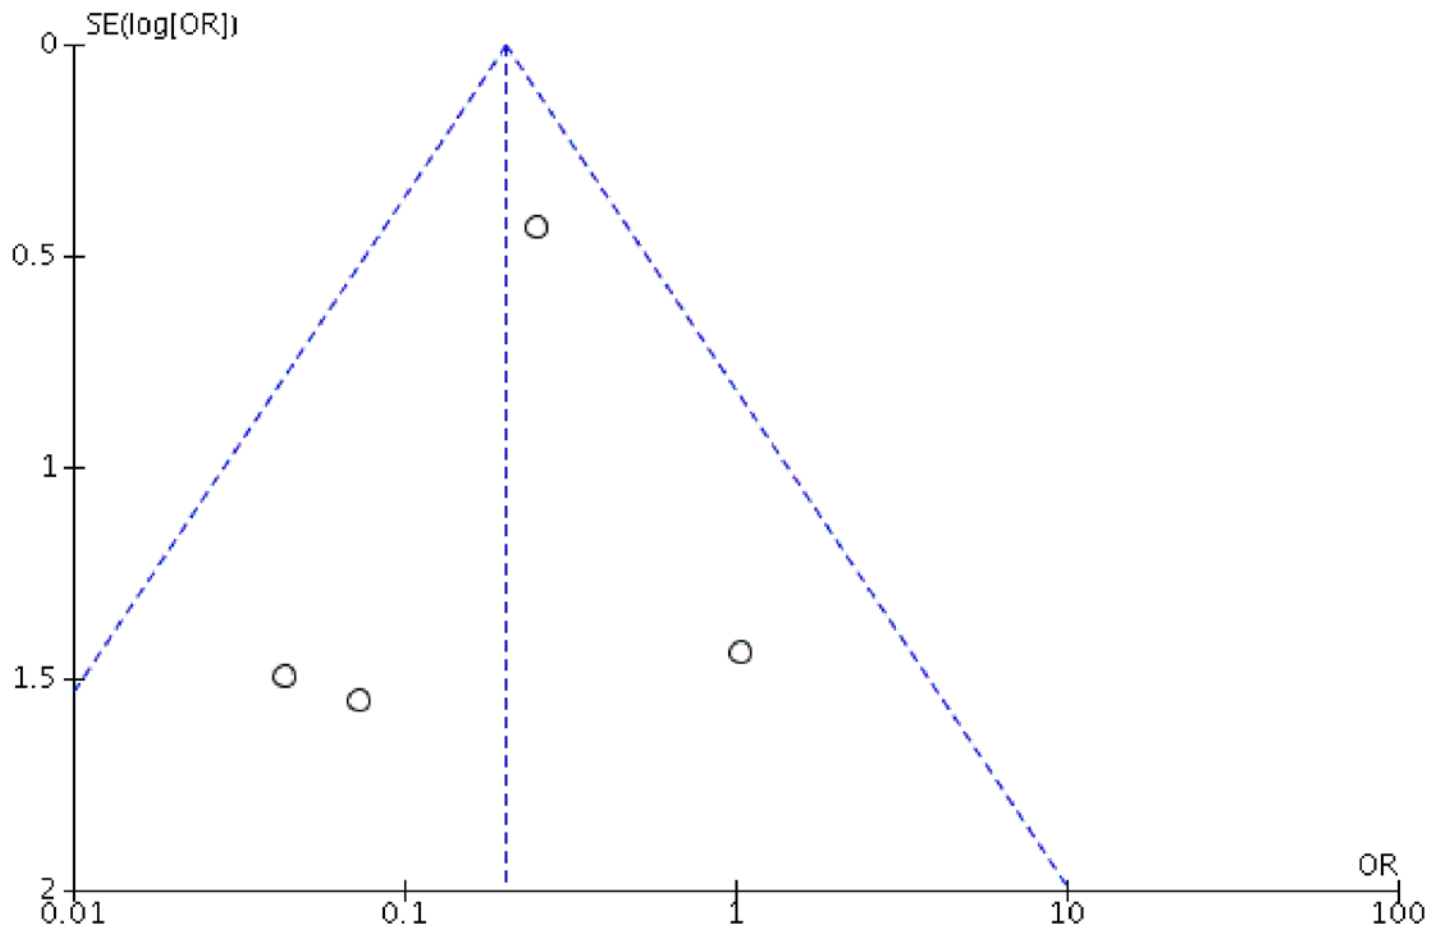

**Supplemental Fig. 9** Risk of Publication Bias Funnel Plot for Included Studies That Examined Adverse Events for EUS-BD for Treatment of Distal Malignant Biliary Obstruction

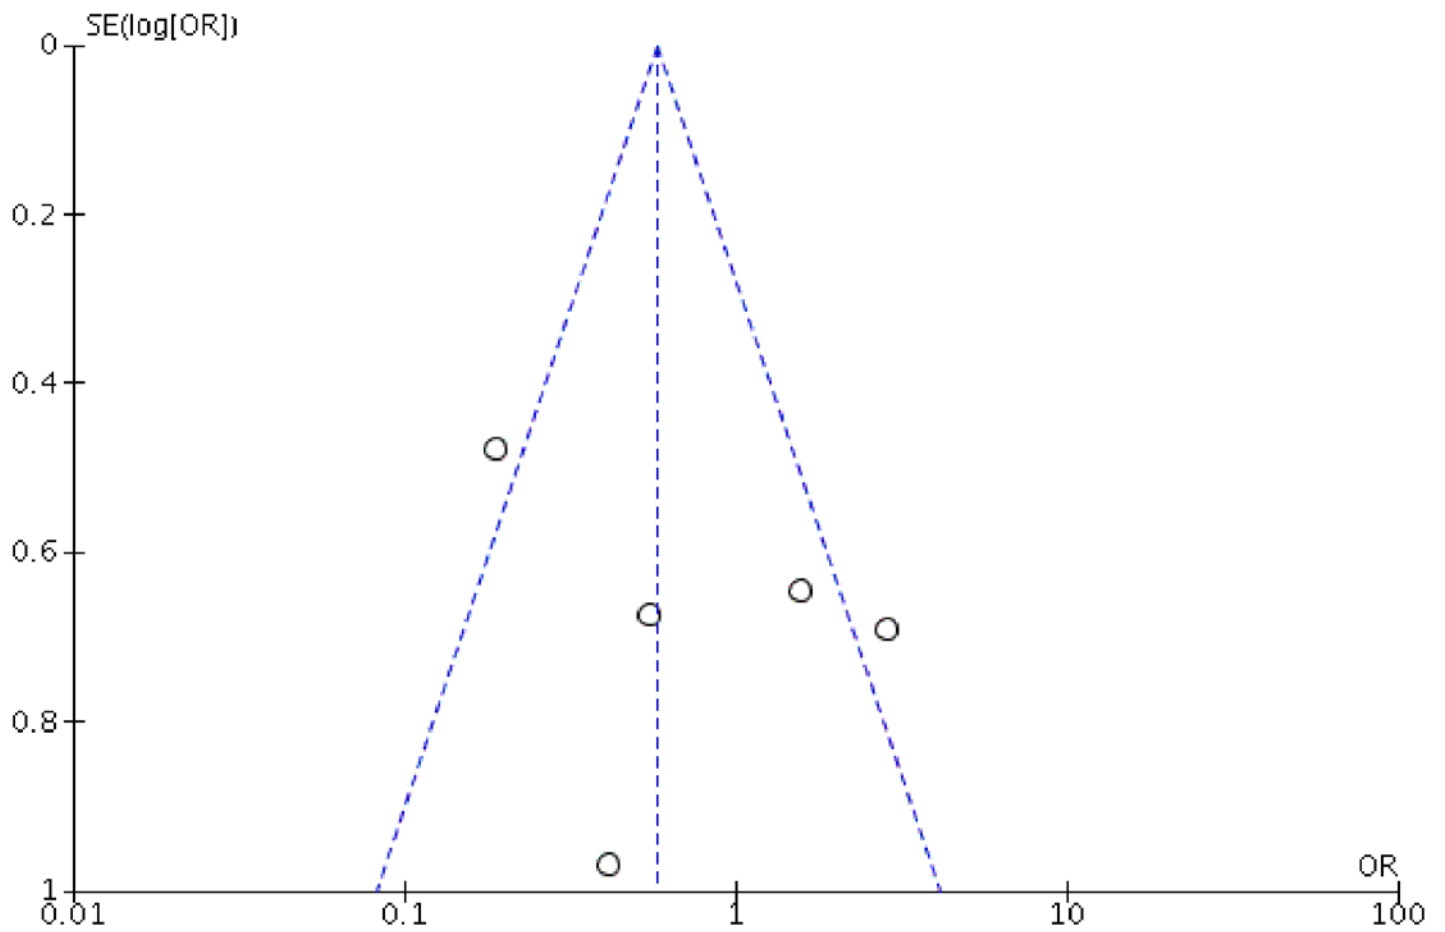

Supplement: 1547supmat-10-1055-a-0990-9488.pdf [file 1547supmat-10-1055-a-0990-9488.pdf]
